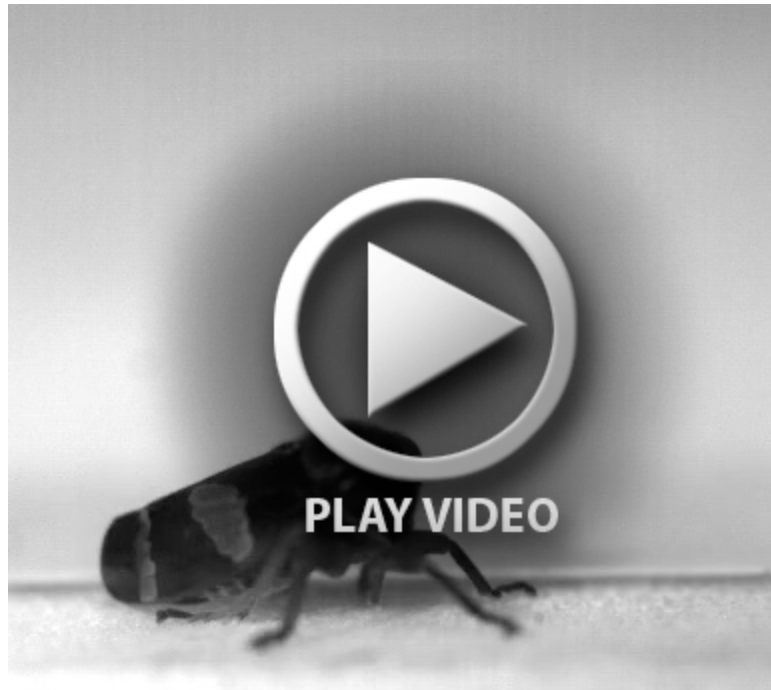

**Movie 1.** A jump by *Pauroeurymela amplicincta* captured at 5000 frames  $s^{-1}$  and replayed at 10 frames  $s^{-1}$ . The insect is viewed from the side as it jumps from the floor of the experimental chamber. See Fig. 3.

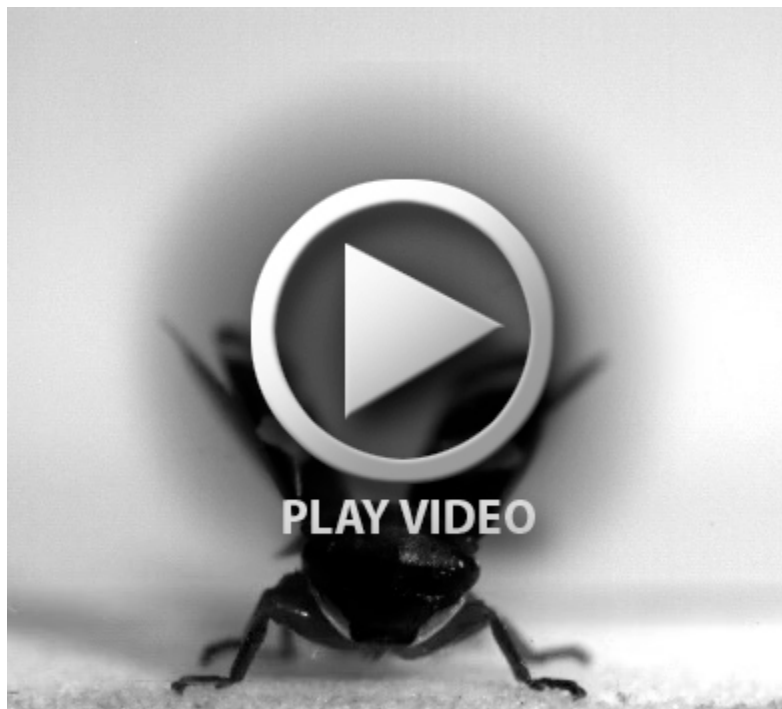

**Movie 2.** A side view of a jump by *Pauroeurymela amplicincta* captured at 5000 frames  $s^{-1}$  and replayed at 10 frames  $s^{-1}$  as it jumps toward the camera and moves its wings. See Fig. 5.
